1 **Transcriptome profiles of eggplant (*Solanum melongena*) and its wild relative *S.***  
2 ***dasyphyllum* under different levels of osmotic stress provide insights into**  
3 **response mechanisms to drought**

4 Gloria Villanueva<sup>a</sup>, Santiago Vilanova<sup>a</sup>, Mariola Plazas<sup>a</sup>, Jaime Prohens<sup>a</sup>, Pietro  
5 Gramazio<sup>b</sup>.

6

7

8 **Affiliations**

9 <sup>a</sup>*Instituto de Conservación y Mejora de la Agrodiversidad Valenciana, Universitat*  
10 *Politècnica de València, Camino de Vera 14, 46022 Valencia, Spain*

11 <sup>b</sup>*Instituto de Biología Molecular y Celular de Plantas, Consejo Superior de*  
12 *Investigaciones Científicas-Universitat Politècnica de València, Camino de Vera 14,*  
13 *46022 Valencia, Spain*

14

15

16 \*Corresponding author:

17 Gloria Villanueva: [glovilpa@etsiamn.upv.es](mailto:glovilpa@etsiamn.upv.es)

18

19

20

21

22

23 **Abstract**

24 Defence mechanisms to abiotic stresses, like drought, are very broad and RNA  
25 sequencing (RNA-Seq) can help in understanding the complex responses triggered. In  
26 this study, we performed RNA-Seq of the transcriptomes of eggplant (*Solanum*  
27 *melongena*) and its related wild species (*S. dasyphyllum*) under two PEG concentrations  
28 (20% and 30%), two different times (after 0.5 h and 2 h of osmotic stress) and at two  
29 plant phenological stages (three and five true fully developed leaves). *Solanum*

30 *dasyphyllum* was more tolerant to osmotic stress, and a differential expression pattern of  
31 drought-related genes was identified between the two species. Plants subjected to a  
32 higher osmotic potential, at a more adult stage and at a higher stress exposure time  
33 displayed a higher number of DEGs (differential expressed genes). Gene ontology (GO)  
34 enrichment analysis revealed that, compared to *S. melongena*, *S. dasyphyllum* triggered  
35 the regulation of a wide range of transcription factors (*AP2/ERF*, DREB, bZIP, WRKY  
36 and bHLH). In both species, the abscisic acid (ABA) signaling response pathway played  
37 a crucial role leading to stomatal closure. Other important pathways involved in abiotic  
38 stresses tolerance including flavonoid, carotenoid and phenylpropanoid biosynthesis,  
39 chlorophyll metabolism and photosynthesis pathway among others were found to have a  
40 relevant role under both moderate and severe osmotic stresses. Our results reveal that *S.*  
41 *dasyphyllum* is a potential source of genes for breeding resilient eggplant varieties.

42

43

44 **Keywords:** transcriptome, RNA Seq, osmotic stress, drought, *Solanum melongena*, *S.*  
45 *dasyphyllum*.

46

## 47 **1. Introduction**

48 Drought spells occur naturally in many areas of the world, but climate change has  
49 accelerated and intensified them, with dramatic consequences on agriculture [1].  
50 Projections indicate that the risk and severity of drought episodes will increase across  
51 the subtropics and mid-latitudes in both hemispheres as a consequence of global  
52 warming and decreased regional precipitation [2,3]. Drought stress triggers  
53 morphological, physiological, biochemical, cellular and molecular response  
54 mechanisms in plants with a potentially severe reduction in plant growth and crop  
55 production as a major consequence. Therefore, determining plant response and tolerance  
56 mechanisms against drought stress is fundamental to mitigating its effects [4,5].

57 The development of new molecular and bioinformatics tools has allowed the expansion  
58 of applied knowledge in breeding programs. In this way, transcriptomics has provided  
59 new potential resources for studying the molecular response of abiotic stress in crops  
60 [6], being RNA sequencing (RNA-Seq) the general method of choice. This method

61 allows a broad coverage of the transcriptome, providing a significant characterization of  
62 mRNA transcripts of specific tissue and time and, in addition, is a quantitative method  
63 that yields a digital gene expression atlas at a genomic scale [7].

64 Drought tolerance is a complex trait involving different components at the  
65 physiological, biochemical and genetic levels [8]. Osmotic stress, resulting in an  
66 increased difficulty for water uptake by the roots, is one of the most important factors in  
67 drought [9]. To unravel the effects of water deficit in genetic networks, the use of a  
68 solution containing polyethylene glycol (PEG) in hydroponic culture is a common  
69 practice to induce osmotic stress and reduce the water potential of tissues in plants  
70 [10,11]. In this way, the transcriptome of PEG-treated plants provides information  
71 regarding drought-related genes, which can be primarily classified in protective and  
72 regulatory genes [7]. Regarding the former, these are genes that encode LEA proteins,  
73 chaperones, osmoprotectants, water channels, ion exchangers, and enzymes involved in  
74 the osmolyte biosynthesis and the reactive oxygen species (ROS), among others  
75 [12,13]. On the other hand, genes encoding regulatory proteins act on the expression of  
76 stress-responsive, including transcription factors, protein kinases and phosphatases,  
77 enzymes involved in phospholipid metabolism and abscisic acid (ABA) biosynthesis  
78 and epigenetic-related genes [14,15].

79 Crop wild relatives (CWRs) are an increasingly fundamental resource for plant breeding  
80 to improve the adaptative capacity of agricultural systems to climate change-related  
81 stresses [16]. Among vegetable crops, eggplant (*Solanum melongena* L.) can be highly  
82 benefited by introgression breeding, as many eggplant CWRs thrive in areas affected by  
83 moderate to severe drought [17]. Eggplant is an important crop, being the eighth  
84 vegetable crop in terms of cultivated area in the world, being widely grown in Asia,  
85 Africa and Europe [18]. It has been described as a relatively drought-tolerant crop and  
86 different degrees of drought tolerance have been observed in cultivated accessions and  
87 CRWs [19–21]. Among these CWRs, *S. dasyphyllum* Schumach. and Thonn. grows  
88 naturally in areas where drought spells are frequent and it has been reported to exhibit  
89 significant drought tolerance both under field and experimental conditions [19,22]. It is  
90 considered the wild ancestor of the gboma eggplant (*S. macrocarpon* L.) [23,24] and is  
91 classified in the Anguivi clade, which includes several African and Southeast Asian  
92 “prickly” species [17,25]. *Solanum dasyphyllum* is a member of the secondary genepool

93 of eggplant [26], and interspecific hybrids and advanced backcross materials of *S.*  
94 *dasyphyllum* with *S. melongena* have been obtained [27,28].

95 In the present study, we analyzed the transcriptomes of a cultivated *S. melongena* and a  
96 drought-tolerant *S. dasyphyllum* accessions under PEG-induced osmotic stress in two  
97 different plant phenological stages and at two times for each phenological stage. By  
98 evaluating its physiological responses in conjunction with the analysis of the gene  
99 expression we aimed at a better comprehensive understanding of the different response  
100 mechanisms against osmotic stress in these materials. The results are of great interest  
101 for a better understanding of drought tolerance and to foster introgression breeding of  
102 drought-tolerant resilient cultivars in eggplant.

103

## 104 **2. Material and Methods**

### 105 *2.1. Plant materials and growth conditions*

106 *Solanum melongena* MEL1 and *S. dasyphyllum* DAS1 accessions were used for the  
107 present study. Seeds were germinated according to Ranil et al. [29] protocol for uniform  
108 eggplant CWRs germination and plants were grown in hydroponic culture according to  
109 Renau-Morata et al. [30] with Hoagland solution [31] in a growth chamber with a 16/8  
110 h light/dark photoperiod, 25°C temperature and 60-65% of humidity. The nutrient  
111 solution was resupplied every four days and an air compressor was used to supply  
112 aeration.

### 113 *2.2. PEG-induced osmotic stress*

114 To evaluate the effect of the plant phenological stage and the stress response, two  
115 osmotic stress experiments were conducted using PEG 6000 (Bio Basic Inc., Ontario,  
116 Canada). One experiment was performed with 20% PEG at a phenological stage of three  
117 fully developed true leaves (Ex\_1), while the other with 30% PEG at the five fully  
118 developed true leaves stage (Ex\_2). In each experiment, leaves of three biological  
119 replicates (i.e., three different plants uniformly developed, each one constituting a  
120 replicate and for each one a library was developed) were taken for each species at three  
121 times: 0 h (control; T0), 0.5 h (T0.5) and 2 h (T2) after initiation of the stress treatment.  
122 Immediately, leaf samples were frozen with liquid nitrogen and stored at -80°C for RNA  
123 extraction. Plant symptoms were registered at different times of the treatments.

### 124 2.3. RNA extraction, sequencing and data processing

125 Total RNA was extracted from leaves samples of each biological replicate using  
126 TRIzol™ Reagent (Invitrogen, Carlsbad, CA, USA). For each of the 36 replicates, the  
127 RNA library was performed by Novogene Co., LTD (Beijing, China) and sequenced on  
128 an Illumina NovaSeq 6000 (paired-end 150 bp). Raw data in FASTQ format were  
129 filtered by removing reads with adaptor contamination, reads containing N > 10% and  
130 low-quality reads (Qscore of over 50% bases below 5). Error rate (%), Q20 (%), Q30  
131 (%) and GC content (%) were calculated for data quality control of clean data. Gene  
132 expression levels were estimated by calculating fragments per kilobase of transcript  
133 sequence per millions of base pairs sequenced (FPKM).

### 134 2.4. Transcriptomic analysis

135 Differentially expressed genes (DEGs) analysis was performed using the DEseq2 R  
136 package [32], and the resulting *p*-values were adjusted using Benjamini and Hochberg's  
137 correction for controlling the false discovery rate (FDR) [33]. Genes with adjusted *p*-  
138 value  $\leq 0.05$  and  $|\log_2(\text{fold change})| \geq 1$  were considered as differentially  
139 expressed. DEGs were annotated based on the functional annotation information of  
140 genes of the eggplant reference genome "67/3" V3 [34]. Venn diagrams of DEGs were  
141 displayed using jvenn, a plug-in for the jQuery JavaScript library [35].

142 Hierarchical clustering analysis was carried out of  $\log_2(\text{FPKM}+1)$  of union differential  
143 expression genes, within all comparison groups. Heatmaps were performed selecting  
144 drought-related DEGs, based on the scientific literature, which were classified  
145 according to their function into four groups: osmoprotectants, phytohormones, protein  
146 kinases and transcription factors using the web tool ClustVis [36].

147 Gene ontology (GO, <http://www.geneontology.org/>) and Kyoto Encyclopedia of Genes  
148 and Genomes (KEGG, <http://www.genome.jp/kegg/>) enrichment analyses of the DEGs  
149 were performed. The tomato (*S. lycopersicum* L.) KEGG pathways annotated database  
150 was used for the analysis, being the closest species with more comprehensive and  
151 reliable information. GO and KEGG terms with an adjusted *p*-value  $\leq 0.05$  were  
152 considered significantly enriched for the DEGs.

153

## 154 3. Results

155 **3.1. Physiological responses to osmotic stress**

156 As a general trend, in both experiments, *S. dasyphyllum* (DAS) displayed a better water  
157 stress tolerance than *S. melongena* (MEL). In Ex\_1, DAS presented visual symptoms  
158 only at T2 while MEL started to show symptoms of stress at T0.5 (Figure 1). In Ex\_2,  
159 manifestations of water stress in plants were observed at T0.5 and T2 in both species in  
160 a faster way with more severe symptoms compared with Ex\_1, although DAS, again,  
161 exhibit more tolerance, with fewer symptoms of wilting (Figure 1).

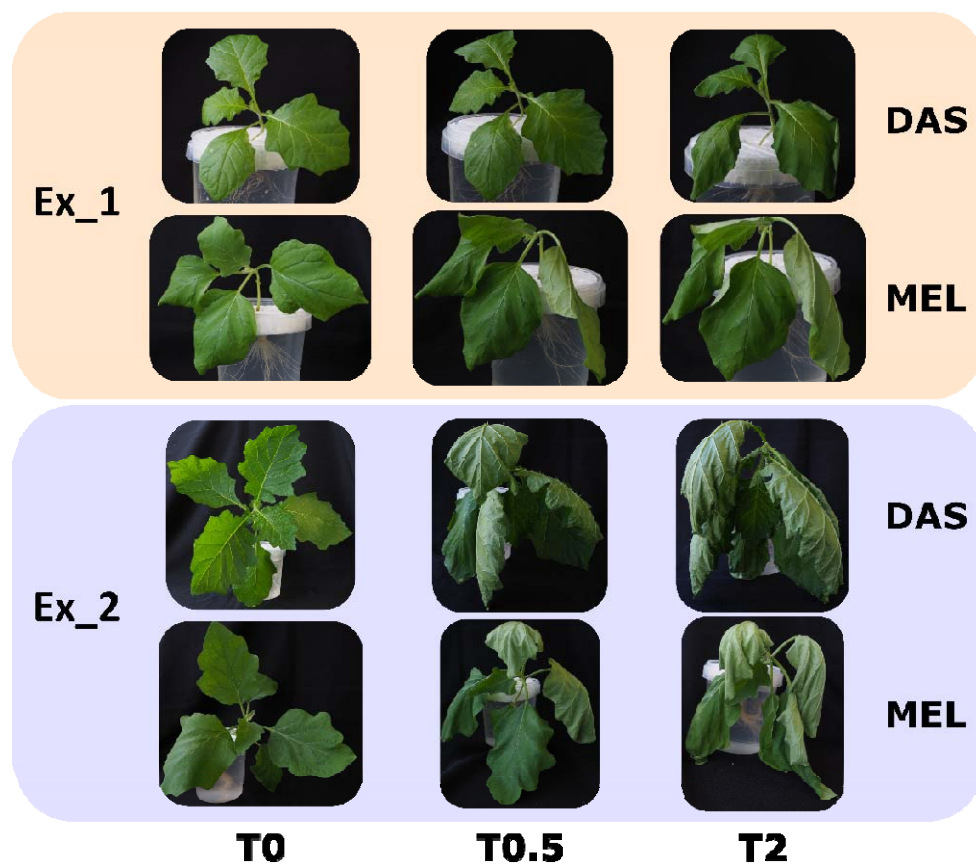

162 **Figure 1.** Representative phenotypes of *S. melongena* (MEL) and *S. dasyphyllum*  
163 (DAS) after 0, 0.5 and 2h of PEG stress in hydroponic culture in both experiments  
164 (Ex\_1 and Ex\_2).

165

166 **3.2. Differential gene expression over time in response to PEG treatment**

167 After filtering raw sequencing data, clean reads showed an error rate between 0.02 and  
168 0.03%, an average Q30 of 93.85% and GC content of 43.17% (Table S1). For each  
169 experiment, DEGs with an adjusted  $p$ -value  $< 0.05$  and a  $|\log_2(\text{fold change})| > 1$  were

170 selected by performing pairwise comparisons at each time of PEG treatment (T0.5 and  
171 T2) with the non-stressed control (T0).

172 In Ex\_1 (20% PEG and three fully developed true leaves stage), a total of 894 and 433  
173 DEGs were detected for DAS and MEL, respectively. For DAS a total of 114 (74 up-  
174 regulated [UR], 40 down-regulated [DR] and 33 related to drought stress) and 840  
175 DEGs (475 UR, 365 DR and 171 related to drought stress) were detected at T0.5 and  
176 T2, respectively (Table 1). For MEL, a total of 327 (273 UR, 54 DR and 89 related to  
177 drought stress) and 117 DEGs (76 UR, 41 DR and 24 related to drought stress) were  
178 detected at T0.5 and T2, respectively (Table 1). Venn diagram analysis showed that in  
179 DAS 52 DEGs were commonly regulated at T0.5 and T2 while 49 and 707 DEGs were  
180 specific at 0.5 and T2, respectively (Figure 2A). In MEL, seven DEGs were commonly  
181 regulated after both times of treatment, 273 and 67 DEGs at T0.5 and T2 respectively  
182 (Figure 2A).

183 In Ex\_2 (30% PEG and five fully developed true leaves) a total of 2,037 and 4,375  
184 DEGs were detected for DAS and MEL, respectively. For DAS, a total of 147 (109 UR  
185 38 DR and 53 related to drought stress) and 1,999 DEGs (1,040 UR, 959 DR and 363  
186 related to drought stress) were detected at T0.5 and T2, respectively (Table 1). For  
187 MEL, a total of 198 (134 UR, 64 DR and 62 related to drought stress) and 4,360 DEGs  
188 (2,252 UR, 2,108 DR and 774 related to drought stress) were detected at T0.5 and T2,  
189 respectively (Table 1). Venn diagram analysis showed that 31 and 80 DEGs were  
190 commonly regulated at T0.5 and T2 exclusively in DAS and MEL respectively (Figure  
191 2B). A total of 20 and 1,065 DEGs were detected only in DAS at T0.5 and T2  
192 respectively. In MEL, 11 and 3,363 DEGs were detected exclusively at T0.5 and T2  
193 respectively. A total of 38 common DEGs were detected for both times and both  
194 accessions. (Figure 2B).

195 **Table 1.** Differentially expressed genes that were up-regulated or down-regulated after  
196 0.5 h (T0.5) and 2 h (T2) of PEG stress in *S. dasycyllum* (DAS) and *S. melongena*  
197 (MEL) in experiments 1 and 2 (Ex\_1 and Ex\_2).

| Experiment | Time comparison | Number of DEGs |            | Up-Regulated DEGs |     | Down-Regulated DEGs |     | Number of DEGs related to drought |     |
|------------|-----------------|----------------|------------|-------------------|-----|---------------------|-----|-----------------------------------|-----|
|            |                 | DAS            | MEL        | DAS               | MEL | DAS                 | MEL | DAS                               | MEL |
|            |                 | Ex_1           | T0 vs T0.5 | 114               | 327 | 74                  | 273 | 40                                | 54  |



|      |            |       |       |       |       |     |       |     |     |
|------|------------|-------|-------|-------|-------|-----|-------|-----|-----|
|      | T0 vs T2   | 840   | 117   | 475   | 76    | 365 | 41    | 171 | 24  |
| Ex_2 | T0 vs T0.5 | 147   | 198   | 109   | 134   | 38  | 64    | 53  | 62  |
|      | T0 vs T2   | 1,999 | 4,360 | 1,040 | 2,252 | 959 | 2,108 | 363 | 774 |

198

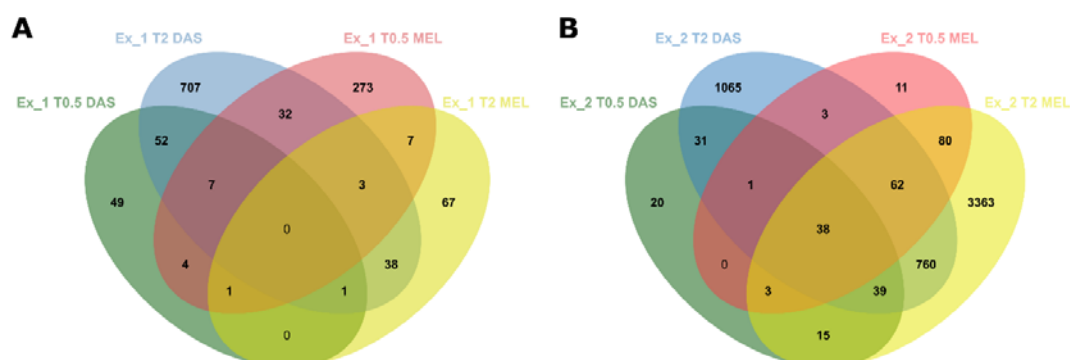

199

200 **Figure 2.** Venn diagram of DEGs under 0.5 and 2h of PEG stress of *S. dasycarpum*  
 201 (DAS) and *S. melongena* (MEL) in experiment 1 (Ex\_1; **A**) and experiment 2 (Ex\_2;  
 202 **B**).

203 Drought-responsive DEGs were classified according to their function into four groups:  
 204 osmoprotectants, phytohormones, protein kinases and transcription factors related to the  
 205 drought stress response. A total of 264 DEGs related to drought were observed in Ex\_1,  
 206 of which 38 of them were genes related to osmoprotectants, 46 were related to the  
 207 synthesis of phytohormones, 67 were protein kinases genes and 113 were transcription  
 208 factors. In Ex\_2 a total of 953 DEGs were detected, of which 150 were genes that  
 209 encode for proteins related to osmoprotectants, 180 were related to phytohormones, 296  
 210 for protein kinases and 327 transcription factors genes (Figure 3).

211 In both experiments, in general, the expression pattern of drought-responsive genes  
 212 changed over time for both accessions, allowing clear differentiation between  
 213 accessions and time of exposure to stress. In all cases, up-regulated and down-regulated  
 214 genes from the different groups of the classification were observed (Figure 3).



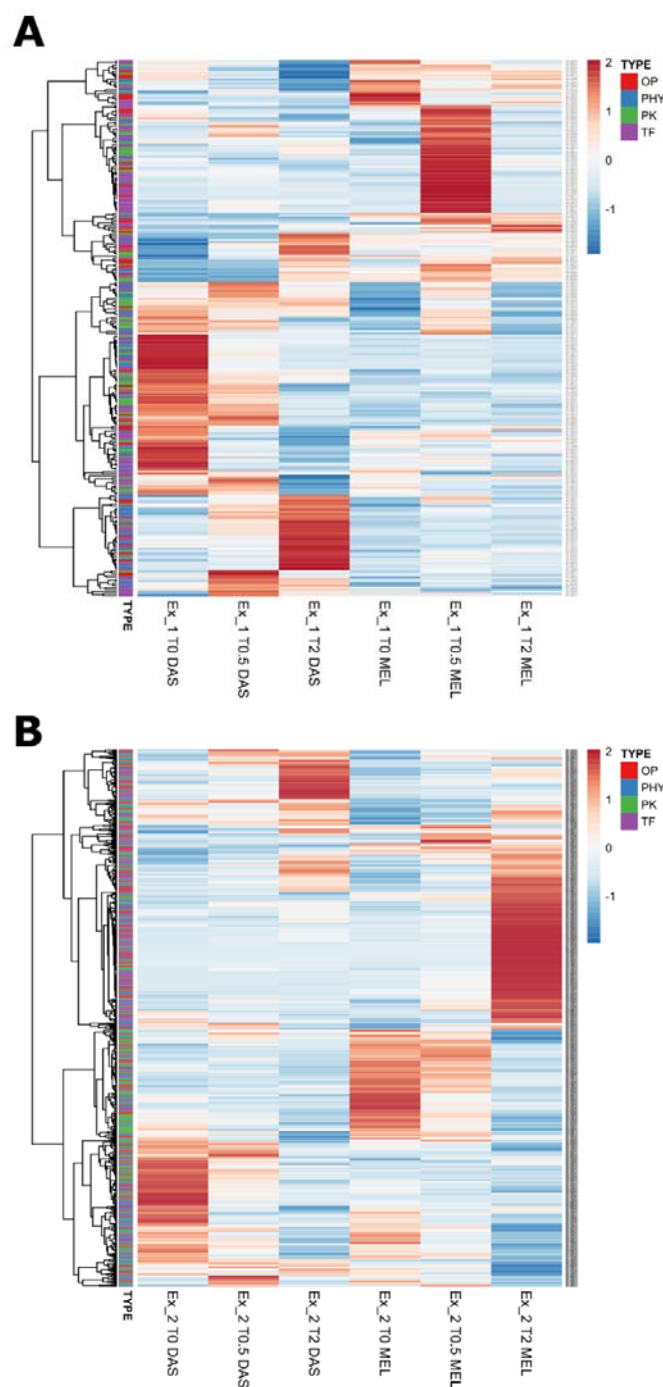

215

216 **Figure 3.** Heatmap of DEGs related to drought stress, osmoprotectants (OP),  
217 phytohormones (PHY), protein kinases (PK) and transcription factor (TF) after 0, 0.5  
218 and 2 h of PEG stress of *S. dasyphyllum* (DAS) and *S. melongena* (MEL) in  
219 experiments 1 (Ex\_1; **A**) and 2 (Ex\_2; **B**).

220 *3.3. GO and KEGG enrichment in DEGs according to phenological stage and stress*  
221 *conditions*

222 A gene ontology (GO) analysis was performed with DEGs being annotated as a  
223 biological process (BP), cellular components (CC) and molecular function (MF). In  
224 Ex\_1, for DAS at T0.5, 37 DEGs were annotated as MF, 13 of them as DNA-binding  
225 transcription factor activity (10 UR and three DR), three as xyloglucan:xyloglucosyl  
226 transferase activity (UR), six as sequence-specific DNA binding (UR), eight as  
227 transferase activity (transferring glycosyl groups; six UR and two DR), seven as  
228 transferase activity (transferring hexosyl groups; five UR and two DR). Regarding CC,  
229 three were annotated as apoplast and cell wall (Figure 4A). After 2 h of osmotic stress  
230 (T2), in DAS, all significant DEGs were annotated as MF, 45 as DNA-binding  
231 transcription factor activity (24 UR and 21 DR), 25 as sequence-specific DNA binding  
232 (16 UR and nine DR) and eight as terpene synthase activity (DR; Figure 4B). For MEL,  
233 at T0.5, a total of 45 DEGs were annotated as MF, 22 of them as DNA-binding  
234 transcription factor activity (19 UR and three DR), nine as calcium ion binding (UR)  
235 and 10 as sequence-specific DNA binding (seven UR and three DR) and four as G  
236 protein-coupled receptor signaling pathway as biological process (UR; Figure 4C). In  
237 MEL at T2, three CC DEGs were annotated as apoplast and cell wall (DR) and three BP  
238 DEGs as phosphorelay signal transduction system (two UR and one DR; Figure 4D).

239

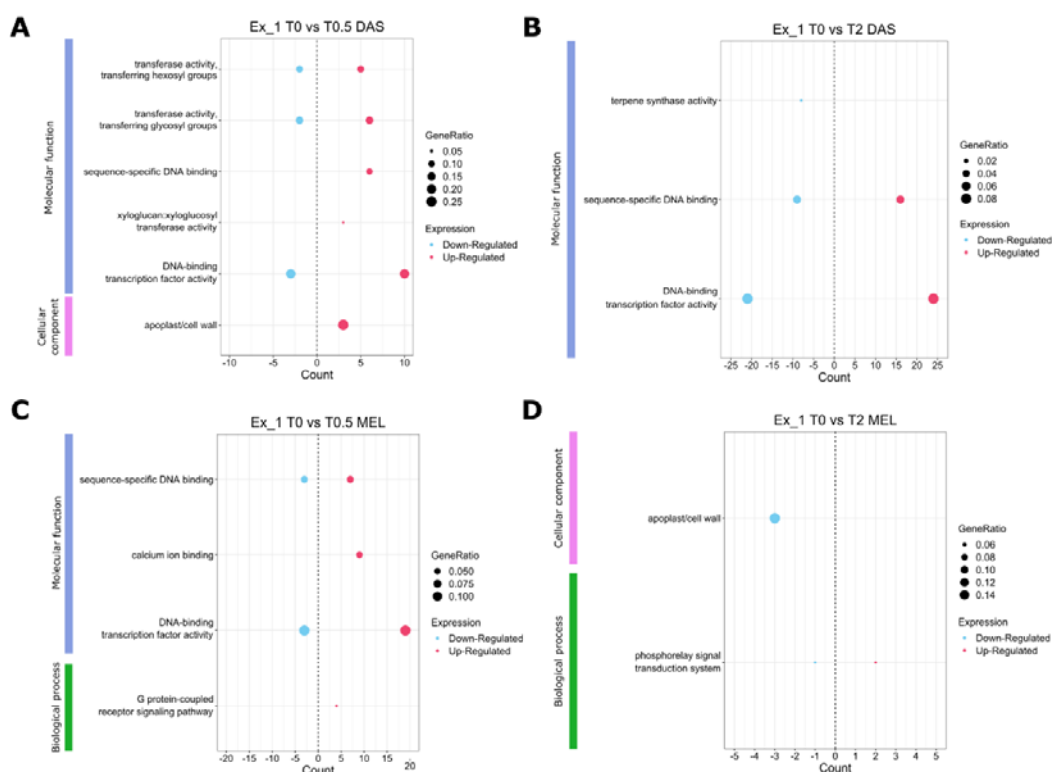

240  
 241 **Figure 4.** Gene ontology (GO) terms enrichment scatter plot in DEGs of *S. dasycyllum*  
 242 (DAS) after 0.5 (T0.5) (A) and 2 h (T2) (B) versus 0 h of PEG stress and *S. melongena*  
 243 (MEL) after 0.5 (T0.5) (C) and 2 h (T2) (D) compared with 0 h of PEG stress in  
 244 experiment 1 (Ex\_1).

245

246 In Ex\_2 for DAS at T0.5, a total of 44 DEGs were annotated, 17 of them as BP, three as  
 247 CC and 24 as MF. Within the biological process category, seven DEGs were annotated  
 248 as a response to chemical (one UR and six DR), six as response to auxin (DR) and four  
 249 as cellular glucan metabolic process (UR), while as CC, three as apoplast and cell wall  
 250 (UR). As molecular function, 11 were annotated as DNA-binding transcription factor  
 251 activity (10 UR and one DR), three as xyloglucan:xyloglucosyl transferase activity  
 252 (UR), four as glucosyltransferase activity (UR) and six as sequence-specific DNA  
 253 binding (UR; Figure 5A). At T2, in DAS, a total of 82 DEGs were annotated as BP, 37  
 254 as response to chemical (10 UR and 27 DR), 24 as response to hormone (one UR and 23  
 255 DR) and 21 as response to auxin (DR). As MF, 49 DEGs as protein dimerization  
 256 activity (29 UR and 20 DR) and 57 as DNA-binding transcription factor activity (35 UR  
 257 and 22 DR) (Figure 5B). For MEL, significant GO terms annotated for BP at T0.5 were  
 258 seven to response to hormone (one UR and six DR), six to response to auxin (DR) and

259 eight to response to chemical (two UR and six DR). Also, 16 DEGs were annotated as  
 260 DNA-binding transcription factor activity (15 UR and one DR) in MF classification  
 261 (Figure 5C). At T2, 161 DEGs were classified as BP, 51 as response to hormone (12 UR  
 262 and 39 DR), 44 as response to auxin (10 UR and 34 DR) and 66 as response to chemical  
 263 (24 UR and 42 DR). As molecular function, 125 were annotated as DNA-binding  
 264 transcription factor activity (102 UR and 23 DR), 72 as sequence-specific DNA binding  
 265 (52 UR and 15 DR), 41 as enzyme inhibitor activity (27 UR and 14 DR), 52 as  
 266 transferase activity (transferring acyl groups other than amino-acyl groups; 31 UR and  
 267 21 DR), 62 as transferase activity (transferring acyl groups; 37 UR and 25 DR), 11  
 268 oxidoreductase activity (acting on the aldehyde or oxo group of donors as; five UR and  
 269 six DR), seven as chitinase activity (six UR and one DR), seven as calcium-dependent  
 270 phospholipid binding (UR) and 19 as endopeptidase inhibitor activity (17 UR and two  
 271 DR) (Figure 5D). Enriched genes annotated in each GO term classification were  
 272 included in Table S2.

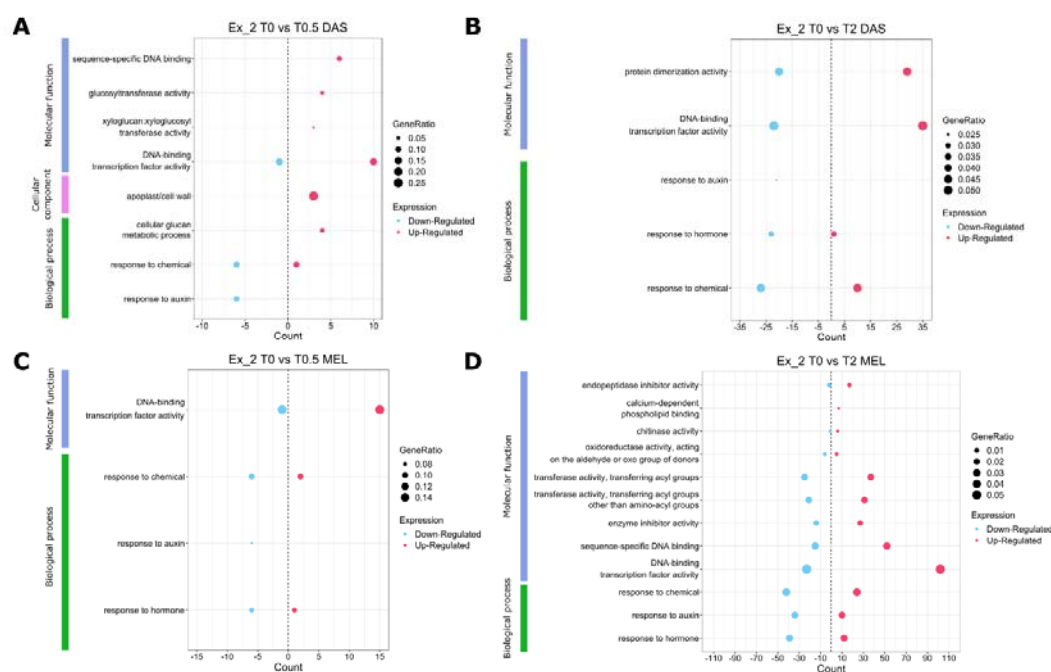

273

274 **Figure 5.** Gene ontology (GO) terms enrichment scatter plot in DEGs of *S. dasycyllum*  
 275 (D) after 0.5 h (T0.5) (A) and 2 h (T2) (B) versus 0 h of PEG stress and *S. melongena*  
 276 (M) after 0.5 h (T0.5) (C) and 2 h (T2) (D) compared with 0h of PEG stress experiment  
 277 2 (Ex\_2).

278

279 A pathway enrichment analysis using the Kyoto Encyclopedia of Genes and Genomes  
280 (KEGG) was performed to identify significant ( $p_{adj} < 0.05$ ) enriched metabolic or  
281 signal transduction pathways associated with differentially expressed genes (DEGs)  
282 comparing the whole genome background. In Ex\_1 more DEGs were assigned to  
283 KEGG pathways in DAS than in MEL. For DAS, at T0.5 and T2, plant hormone signal  
284 transduction and MAPK (mitogen activated protein kinase) signaling pathway were  
285 identified as enriched pathway (five UR and five DR DEGs). For T2 were also  
286 determined circadian rhythm (seven UR and two DR DEGs), sesquiterpenoid and  
287 triterpenoid biosynthesis (seven DR DEGs), galactose metabolism (seven UR DEGs)  
288 and zeatin biosynthesis (one UR and eight DR) as enriched pathways. For MEL at T0.5,  
289 plant-pathogen interaction (10 UR DEGs) and, at T2, circadian rhythm (eight UR and  
290 two DR DEGs) were enriched pathways detected (Table 2). In Ex\_2, more expressed  
291 genes were assigned to metabolic pathways in MEL than for DAS. For DAS at T0.5,  
292 DEGs were assigned to plant hormone signal transduction (six UR and eight DR) and  
293 also to MAPK signaling pathway (three UR and four DR). At T2, plant hormone signal  
294 transduction (16 UR and 29 DR DEGs) and the phenylpropanoid biosynthesis (17 UR  
295 and 11 DR) were determined as enriched pathways. For MEL at T0.5, plant hormone  
296 signal transduction (nine UR and six DR DEGs), MAPK signaling pathway (three UR  
297 and four DR), fatty acid elongation (three DR), and carotenoid biosynthesis (three UR)  
298 were found to be enriched pathways. At T2, DEGs were linked to porphyrin and  
299 chlorophyll metabolism (seven UR and 21 DR), plant hormone signal transduction (58  
300 UR and 37 DR), photosynthesis and antenna proteins (10 DR),  $\alpha$ -linolenic acid  
301 metabolism (24 UR and two DR MAPK signaling pathway (53 UR and 16 DR),  
302 flavonoid biosynthesis (nine UR and nine DR and glutathione metabolism (21 UR and  
303 seven DR) (Table 2). Enriched genes annotated in each KEGG pathway classification  
304 were included in Table S3.

305

306 **Table 2.** Significant Kyoto Encyclopedia of Genes and Genomes (KEGG) enriched  
307 pathways and its ID of tomato database in *S. dasyphyllum* (DAS) and *S. melongena*  
308 (MEL) after 0.5 h (T0.5) and 2 h (T2) of PEG stress in experiments 1 (Ex\_1) and 2  
309 (Ex\_2).

| Experiment | Time comparison | Accession | Pathway Terms | ID | Count | Up-Regulated | Down-Regulated |
|------------|-----------------|-----------|---------------|----|-------|--------------|----------------|
|------------|-----------------|-----------|---------------|----|-------|--------------|----------------|

|                                               |            |                                      |                                   |          |    |    |    |
|-----------------------------------------------|------------|--------------------------------------|-----------------------------------|----------|----|----|----|
| Ex_1                                          | T0 vs T0.5 | DAS                                  | Plant hormone signal transduction | sly04075 | 10 | 5  | 5  |
|                                               |            |                                      | MAPK signaling pathway - plant    | sly04016 | 8  | 3  | 5  |
|                                               | T0 vs T2   | DAS                                  | Plant-pathogen interaction        | sly04626 | 10 | 10 | 0  |
|                                               |            |                                      | Plant hormone signal transduction | sly04075 | 32 | 12 | 20 |
|                                               |            |                                      | MAPK signaling pathway - plant    | sly04016 | 27 | 10 | 17 |
|                                               |            | MEL                                  | Circadian rhythm - plant          | sly04712 | 9  | 7  | 2  |
| Sesquiterpenoid and triterpenoid biosynthesis |            |                                      | sly00909                          | 7        | 0  | 7  |    |
| Galactose metabolism                          |            |                                      | sly00052                          | 7        | 7  | 0  |    |
| Ex_2                                          | T0 vs T0.5 | DAS                                  | Zeatin biosynthesis               | sly00908 | 8  | 1  | 7  |
|                                               |            |                                      | Circadian rhythm - plant          | sly04712 | 10 | 8  | 2  |
|                                               | T0 vs T0.5 | DAS                                  | Plant hormone signal transduction | sly04075 | 14 | 6  | 8  |
|                                               |            |                                      | MAPK signaling pathway - plant    | sly04016 | 7  | 3  | 4  |
|                                               |            | MEL                                  | Plant hormone signal transduction | sly04075 | 15 | 9  | 6  |
|                                               |            |                                      | MAPK signaling pathway - plant    | sly04016 | 10 | 7  | 3  |
| T0 vs T2                                      | DAS        | Fatty acid elongation                | sly00062                          | 3        | 0  | 3  |    |
|                                               |            | Carotenoid biosynthesis              | sly00906                          | 3        | 3  | 0  |    |
|                                               | MEL        | Plant hormone signal transduction    | sly04075                          | 45       | 16 | 29 |    |
|                                               |            | Phenylpropanoid biosynthesis         | sly00940                          | 28       | 17 | 11 |    |
|                                               |            | Porphyrin and chlorophyll metabolism | sly00860                          | 28       | 7  | 21 |    |
|                                               |            | Plant hormone signal transduction    | sly04075                          | 95       | 58 | 37 |    |
|                                               |            | Photosynthesis - antenna proteins    | sly00196                          | 10       | 0  | 10 |    |
|                                               |            | $\alpha$ -Linolenic acid metabolism  | sly00592                          | 26       | 24 | 2  |    |
| T0 vs T2                                      | MEL        | MAPK signaling pathway - plant       | sly04016                          | 69       | 53 | 16 |    |
|                                               |            | Flavonoid biosynthesis               | sly00941                          | 18       | 9  | 9  |    |
|                                               |            |                                      | Glutathione metabolism            | sly00480 | 28 | 21 | 7  |

311

#### 312 **4. Discussion**

313 Eggplant has been considered a relatively drought-tolerant crop since a long time ago  
314 [37] and several studies to evaluate the physiological and biochemical responses to  
315 water stress of different eggplant cultivars and wild relatives have been performed  
316 [21,38,39]. However, detailed molecular mechanisms in response to drought stress in  
317 eggplant are not well known and, to our knowledge, transcriptional analysis by RNA-  
318 Seq method has not been reported so far. In the current study, we evaluated plants of the  
319 cultivated eggplant *S. melongena* and its wild relative *S. dasyphyllum* under two  
320 concentrations of PEG (20% and 30%) at two different phenological stages (three and  
321 five fully developed true leaves) in hydroponic conditions in order to obtain a general  
322 overview of their response to osmotic stress and get insight in the gene expression  
323 involved in response and tolerance to drought. *Solanum dasyphyllum* displayed a better  
324 water deficit tolerance than *S. melongena*, confirming its already recently reported  
325 drought tolerance in field and experimental conditions [19,22]. PEG concentration had a  
326 visually significant effect in physiological response, with more symptoms in Ex\_2, in  
327 which plants were subjected to a higher PEG concentration, resulting in a higher  
328 osmotic potential [41].

329 RNA sequencing is a tool for transcriptome analysis that has allowed a better  
330 understanding of the functions of the genome [42]. In this research, the analysis of  
331 differential gene expression has enabled the study of the response to osmotic stress in  
332 both species at the genomic level. One of the most important components of drought  
333 stress is osmotic stress and it has been widely used to study drought tolerance in many  
334 species [9]. In our study, in general, osmotic stress treatments mainly triggered an  
335 activation response, as more significantly up-regulated than down-regulated DEGs were  
336 observed. The number of DEGs increased as PEG concentration was higher and longer  
337 in time, as was previously reported in potato (*Solanum tuberosum* L.) [43,44]. The  
338 expression pattern of drought-responsive genes displayed large differences between *S.*  
339 *dasyphyllum* and *S. melongena*, revealing very divergent response mechanisms under an  
340 osmotic stress according to plant physiological observations.

341 This study has disclosed the main functions and pathways expressed of two related  
342 species with large differences in osmotic stress response. GO enrichment of the



343 identified DEGs has allowed establishing the biological functions associated to those  
344 genes. *Solanum dasyphyllum* expressed genes were involved in diverse functions related  
345 to osmotic stress response. On one side, genes involved in the modification of cell wall  
346 and apoplast structure, such as xyloglucan:xyloglucosyl transferases [45,46], were  
347 enriched in the wild species. Other up-regulated genes in *S. dasyphyllum* in response to  
348 osmotic stress were classified in the DNA-binding transcription factor activity and  
349 sequence-specific DNA binding GO terms, including a wide range of transcription  
350 factors (TFs), which exert crucial roles in diverse signaling pathways in different abiotic  
351 stress response as *AP2/ERF* (APETALA2/Ethylene Response Factor) family [47] and  
352 two of its major subfamilies such as dehydration-responsive element binding proteins  
353 (DREBs) and ethylene-responsive element (ERE) binding factors [48,49]. The same  
354 occurs with TFs, from homeobox-leucine zipper family [50–52], basic leucine zipper  
355 (bZIP) [53] and WRKY family [54]. Meanwhile, in the case of *S. melongena*, the  
356 expression of *AP2/ERF*, WRKY and bZIP TFs was also observed, however, in general,  
357 the number of differential genes expressed under the stress treatments was fewer. When  
358 plants were subjected to the higher osmotic potential, the overall gene expression was  
359 also higher and included DEGs classified in response to chemical and hormones and  
360 also down-regulated genes related to auxin response. Auxins are involved in the  
361 regulation of plant growth and development and auxin response factors (ARFs) gene  
362 family play an essential role in the regulation of auxin-relative genes in abiotic stress  
363 responses in tomato (*S. lycopersicum*) [55]. Basic helix-loop-helix (bHLH) transcription  
364 factors were overexpressed in *S. dasyphyllum*, which they have been reported to be  
365 involved in the response to abiotic stresses in potato (*S. tuberosum*) [56] and pepper  
366 (*Capsicum annuum* L.) [57]. For *S. melongena*, exposure to a higher osmotic stress  
367 resulted in the differential expression of genes related to enzyme inhibitor activity,  
368 transferases, chitinase and oxidoreductase activities, among others. The overall response  
369 observed was very broad, with the wild species (*S. dasyphyllum*) showing a greater and  
370 more diverse expression of genes involved in drought response, which could be related  
371 to its increased tolerance.

372 KEGG analysis revealed significant enriched pathways related to osmotic stress such as  
373 plant hormone signal transduction and MAPK signaling. In these pathways, genes  
374 encoding for the three main components of the core Abscisic Acid (ABA) signaling  
375 response were up-regulated, a pathway that has been widely reported as a key drought

376 stress response [58]. Among those genes, protein phosphatases type-2C (PP2Cs), ABA  
377 receptors PYR/PYL/RCAR (PYRABACTIN-RESISTANCE 1/PYRABACTIN  
378 RESISTANCE LIKE/REGULATORY COMPONENT OF ABA RECEPTOR) and  
379 SNF1-Related Protein Kinases type 2 (SnRK2s) were identified as DEGs [59].  
380 Although PP2Cs are negative regulators of ABA signalling, an increased relative  
381 expression under drought stress conditions has been reported in other similar studies  
382 [60–62], suggesting that these apparent contrasting effects need to be further  
383 investigated. AREB/ABF transcription factors and MAPKKs (mitogen activated protein  
384 kinase kinase) were also activated as a response to ABA signaling, which leads to  
385 stomatal closure, one of the most important drought responses [59,63]. *Solanum*  
386 *dasyphyllum* displayed a wide variety of response mechanisms along with the ABA  
387 pathway. These included galactinol synthase and transferases related genes, which have  
388 been reported to improve drought tolerance [64]. Also, zeatin biosynthesis was down-  
389 regulated, in particular the cytokinin signaling repressors A-type ARABIDOPSIS  
390 RESPONSE REGULATORS (ARRs), which have been reported to negatively regulate  
391 by drought stress, promoting cell division in meristems [65–67]. In addition,  
392 GIGANTEA (GI) protein synthesis was activated, which is a regulator in the circadian  
393 rhythm plant pathway and improves drought tolerance [68]. Finally, phenylpropanoid  
394 biosynthesis pathway was detected, which exhibits different important roles in the  
395 regulation under abiotic stress conditions [69]. On the other hand, *S. melongena* showed  
396 different drought response pathways, including the carotenoid biosynthesis, which has  
397 been reported to have a similar regulation in *S. tuberosum* [60], the inactivation of  
398 porphyrin, chlorophyll metabolism and photosynthesis pathways as a consequence of  
399 the osmotic stress [70]. Furthermore, the regulation of flavonoid biosynthesis, which  
400 has an important role in coping with environmental stress [69], the expression of plant  
401 glutathione transferases (GSTs), which has been reported to be involved in responses to  
402 biotic and abiotic stress [71], and the synthesis of the stress signaling molecule, such as  
403 jasmonic acid (JA) by the metabolism of  $\alpha$ -Linolenic acid [72] were linked to osmotic  
404 stress. When the plants are more adult and under a more intense osmotic stress, ABA  
405 signaling response leads to stomatal closure and to the down regulation of small auxin  
406 up-regulated RNA (SAUR) genes, which induce plant growth [73]. In our study, a  
407 common response as stress adaptation has been observed, including ABA signaling  
408 response and inhibition of plant growth.

409

## 410 **5. Conclusions**

411 The present work provides an overview of the osmotic stress response at the  
412 transcriptomic level of cultivated eggplant (*S. melongena*) and its drought-tolerant wild  
413 relative *S. dasyphyllum*. We have found that osmotic potential and plant phenological  
414 stage play a crucial role in the response, which is increased when the exposure time was  
415 longer and osmotic stress was more intense. Our data showed that response  
416 mechanisms at the gene expression level were very wide-ranging, including  
417 transcription factors, phytohormones, osmoprotectants and protein kinases, being ABA  
418 response signaling an important pathway. Clear differences observed between the two  
419 species in the response to osmotic stress and overall gene expression pattern confirmed  
420 that *S. dasyphyllum* is a potential source for breeding to drought tolerance in eggplant.  
421 Overall, our work provided insights into the gene expression mechanisms of tolerance  
422 to osmotic stress in eggplant and its wild relative *S. dasyphyllum*, which is of great  
423 relevance in the improvement of drought tolerance of cultivated eggplant.

424

## 425 **Supplementary information**

426 **Supplementary Table S1.** Data quality summary of samples of experiment 1 and 2,  
427 after 0, 0.5 and 2 h of PEG stress of *S. dasyphyllum* (DAS) and *S. melongena* (MEL).

428 **Supplementary Table S2.** Gene ontology (GO) terms enrichment and regulation, ID,  
429 description and transcription factor family of DEGs in *S. dasyphyllum* after 0.5 (T0.5)  
430 (A) and 2 h (T2) versus 0h of PEG stress and *S. melongena* (M) after 0.5 (T0.5) and 2 h  
431 (T2) compared with 0h of PEG stress experiment 2 (Ex\_2).

432 **Supplementary Table S3.** Significant Kyoto Encyclopedia of Genes and Genomes  
433 (KEGG) enriched pathways, its ID of tomato database, and regulation ID, description  
434 and transcription factor family of DEGs in *S. dasyphyllum* (D) and *S. melongena* (M)  
435 after 0.5 h (T0.5) and 2 h (T2) of PEG stress in experiments 1 (Ex\_1) and 2 (Ex\_2).

436

## 437 **Acknowledgements**

438 This work was funded by MCIN/AEI/ 10.13039/501100011033/, “ERDF A way of  
439 making Europe” through grant RTI-2018–094592-B-I00 and by Conselleria  
440 d’Innovació, Universitats, Ciència i Societat Digital (Generalitat Valenciana, Spain)  
441 with the grant CIPROM/2021/020. The Spanish Ministerio de Ciencia e Innovación,  
442 Agencia Estatal de Investigación and Fondo Social Europeo, funded a predoctoral  
443 fellowship to Gloria Villanueva (PRE2019-103375). Pietro Gramazio is grateful to  
444 Spanish Ministerio de Ciencia e Innovación for a post-doctoral grant (RYC2021-  
445 031999-I) funded by (MCIN/AEI /10.13039/501100011033) and the European Union  
446 through NextGenerationEU/PRTR.

447

#### 448 **Declaration of Competing Interest**

449 The authors declare that they have no known competing financial interests or personal  
450 relationships that could have appeared to influence the work reported in this paper.

451

#### 452 **References**

- 453 [1] S. Mukherjee, A. Mishra, K.E. Trenberth, Climate change and drought: a  
454 perspective on drought indices, *Curr. Clim. Chang. Reports*. 4 (2018) 145–163.  
455 <https://doi.org/10.1007/s40641-018-0098-x>.
- 456 [2] B.I. Cook, J.S. Mankin, K.J. Anchukaitis, Climate change and drought: from past  
457 to future, *Curr. Clim. Chang. Reports*. 4 (2018) 164–179.  
458 <https://doi.org/10.1007/s40641-018-0093-2>.
- 459 [3] IPCC, Intergovernmental panel on climate change. Proceeding of the Sixth  
460 Assesment Report, WGII, Climate change 2022: impacts, adaptation and  
461 vulnerability, 2022. <https://www.ipcc.ch/report/ar6/wg2/>.
- 462 [4] M. Ilyas, M. Nisar, N. Khan, A. Hazrat, A.H. Khan, K. Hayat, S. Fahad, A.  
463 Khan, A. Ullah, Drought tolerance strategies in plants: a mechanistic approach, *J.*  
464 *Plant Growth Regul.* 40 (2021) 926–944. <https://doi.org/10.1007/s00344-020-10174-5>.
- 466 [5] M.A. Hossain, S.H. Wani, S. Bhattacharjee, D.J. Burritt, L.-S.P. Tran, Drought  
467 stress tolerance in plants, Vol 2, Springer International Publishing, 2016.

- 468 <https://doi.org/10.1007/978-3-319-32423-4>.
- 469 [6] J. Zhuang, J. Zhang, X.L. Hou, F. Wang, A.S. Xiong, Transcriptomic, Proteomic,  
470 Metabolomic and Functional Genomic Approaches for the Study of Abiotic  
471 Stress in Vegetable Crops, CRC. Crit. Rev. Plant Sci. 33 (2014) 225–237.  
472 <https://doi.org/10.1080/07352689.2014.870420>.
- 473 [7] É.A. Kido, J.R.C. Ferreira-Neto, V. Pandolfi, A.C. de Melo Souza, A.M. Benko-  
474 Iseppon, Drought stress tolerance in plants: insights from transcriptomic studies,  
475 in: Drought Stress Toler. Plants, Vol 2, Springer International Publishing, 2016:  
476 pp. 153–185.
- 477 [8] N.H. Samarah, Understanding How Plants Respond to Drought Stress at the  
478 Molecular and Whole Plant Levels, in: Drought Stress Toler. Plants, Vol 2,  
479 Springer International Publishing, 2016: pp. 1–38.
- 480 [9] E.S. Haswell, P.E. Verslues, The ongoing search for the molecular basis of plant  
481 osmosensing, J. Gen. Physiol. 145 (2015) 389–394.  
482 <https://doi.org/10.1085/jgp.201411295>.
- 483 [10] H. Claeys, D. Inzé, The agony of choice: How plants balance growth and survival  
484 under water-limiting conditions, Plant Physiol. 162 (2013) 1768–1779.  
485 <https://doi.org/10.1104/pp.113.220921>.
- 486 [11] N. Osmolovskaya, J. Shumilina, A. Kim, A. Didio, T. Grishina, T. Bilova, O.A.  
487 Keltsieva, V. Zhukov, I. Tikhonovich, E. Tarakhovskaya, A. Frolov, L.A.  
488 Wessjohann, Methodology of drought stress research: Experimental setup and  
489 physiological characterization, Int. J. Mol. Sci. 19 (2018).  
490 <https://doi.org/10.3390/ijms19124089>.
- 491 [12] L. Chen, J. Meng, Y. Luan, miR1916 plays a role as a negative regulator in  
492 drought stress resistance in tomato and tobacco, Biochem. Biophys. Res.  
493 Commun. 508 (2019) 597–602. <https://doi.org/10.1016/j.bbrc.2018.11.165>.
- 494 [13] R. Riyazuddin, N. Nisha, K. Singh, R. Verma, R. Gupta, Involvement of  
495 dehydrin proteins in mitigating the negative effects of drought stress in plants,  
496 Plant Cell Rep. (2021). <https://doi.org/10.1007/s00299-021-02720-6>.
- 497 [14] K. Shinozaki, K. Yamaguchi-Shinozaki, Gene networks involved in drought

- 498 stress response and tolerance, *J. Exp. Bot.* 58 (2007) 221–227.  
499 <https://doi.org/10.1093/jxb/erl164>.
- 500 [15] J. Wang, C. Li, L. Li, M. Reynolds, X. Mao, R. Jing, Exploitation of drought  
501 tolerance-related genes for crop improvement, *Int. J. Mol. Sci.* 22 (2021).  
502 <https://doi.org/10.3390/ijms221910265>.
- 503 [16] J. Prohens, P. Gramazio, M. Plazas, H. Dempewolf, B. Kilian, M.J. Díez, A. Fita,  
504 F.J. Herraiz, A. Rodríguez-Burruezo, S. Soler, S. Knapp, S. Vilanova,  
505 Introgressomics: a new approach for using crop wild relatives in breeding for  
506 adaptation to climate change, *Euphytica*. 213 (2017) 158.  
507 <https://doi.org/10.1007/s10681-017-1938-9>.
- 508 [17] M.S. Vorontsova, S. Knapp, A revision of the spiny solanums, *Solanum*  
509 subgenus *Leptostemonum* (Solanaceae) in Africa and Madagascar, *Syst. Bot.*  
510 *Monogr.* 99 (2016) 1–436. <https://doi.org/https://doi.org/10.5519/0055154>.
- 511 [18] FAO, FAOSTAT database collections, (2020). <http://faostat.fao.org/>.
- 512 [19] A.B. Kouassi, K.B.A. Kouassi, Z. Sylla, M. Plazas, R.M. Fonseca, A. Kouassi,  
513 H. Fonseca, A.S.P. N’guetta, J. Prohens, Genetic parameters of drought tolerance  
514 for agromorphological traits in eggplant, wild relatives, and interspecific hybrids,  
515 *Crop Sci.* 61 (2020) 55–68. <https://doi.org/10.1002/csc2.20250>.
- 516 [20] J.C. Díaz-Pérez, T.E. Eaton, Eggplant (*Solanum melongena* L.) Plant growth and  
517 fruit yield as affected by drip irrigation rate, *HortScience*. 50 (2015) 1709–1714.  
518 <https://doi.org/10.21273/hortsci.50.11.1709>.
- 519 [21] M. Plazas, H.T. Nguyen, S. González-Orenga, A. Fita, O. Vicente, J. Prohens, M.  
520 Boscaiu, Comparative analysis of the responses to water stress in eggplant  
521 (*Solanum melongena*) cultivars, *Plant Physiol. Biochem.* 143 (2019) 72–82.  
522 <https://doi.org/10.1016/j.plaphy.2019.08.031>.
- 523 [22] M. Plazas, S. González-Orenga, H.T. Nguyen, I.M. Morar, A. Fita, M. Boscaiu,  
524 J. Prohens, O. Vicente, Growth and antioxidant responses triggered by water  
525 stress in wild relatives of eggplant, *Sci. Hortic. (Amsterdam)*. 293 (2022)  
526 110685. <https://doi.org/10.1016/j.scienta.2021.110685>.
- 527 [23] M. Plazas, I. Andújar, S. Vilanova, P. Gramazio, F. Javier Herraiz, J. Prohens,

- 528 Conventional and phenomics characterization provides insight into the diversity  
529 and relationships of hypervariable scarlet (*Solanum aethiopicum* L.) and gboma  
530 (*S. macrocarpon* L.) eggplant complexes, *Front. Plant Sci.* 5 (2014) 1–13.  
531 <https://doi.org/10.3389/fpls.2014.00318>.
- 532 [24] Z.R. Bukenya, J.F. Carasco, Biosystematic study of *Solanum macrocarpon*—*S.*  
533 *dasyphyllum* complex in Uganda and relations with *Solanum linnaeanum*, *East*  
534 *African Agric. Adn For. J.* 59 (1994) 187–204.  
535 <https://doi.org/10.1080/00128325.1994.11663195>.
- 536 [25] M.S. Vorontsova, S. Stern, L. Bohs, S. Knapp, African spiny solanum (subgenus  
537 *leptostemonum*, solanaceae): A thorny phylogenetic tangle, *Bot. J. Linn. Soc.*  
538 173 (2013) 176–193. <https://doi.org/10.1111/boj.12053>.
- 539 [26] M.M. Syfert, N.P. Castañeda-Álvarez, C.K. Khoury, T. Särkinen, C.C. Sosa,  
540 H.A. Achicanoy, V. Bernau, J. Prohens, M.-C. Daunay, S. Knapp, Crop wild  
541 relatives of the brinjal eggplant (*Solanum melongena*): Poorly represented in  
542 genebanks and many species at risk of extinction, *Am. J. Bot.* 103 (2016) 635–  
543 651. <https://doi.org/10.3732/ajb.1500539>.
- 544 [27] B. Kouassi, J. Prohens, P. Gramazio, A.B. Kouassi, S. Vilanova, A. Galán-Ávila,  
545 F.J. Herraiz, A. Kouassi, J.M. Seguí-Simarro, M. Plazas, Development of  
546 backcross generations and new interspecific hybrid combinations for  
547 introgression breeding in eggplant (*Solanum melongena*), *Sci. Hortic.*  
548 (Amsterdam). 213 (2016) 199–207. <https://doi.org/10.1016/j.scienta.2016.10.039>.
- 549 [28] M. Plazas, S. Vilanova, P. Gramazio, A. Rodríguez-Burruezo, A. Fita, F.J.  
550 Herraiz, R. Ranil, R. Fonseka, L. Niran, H. Fonseka, B. Kouassi, A. Kouassi, A.  
551 Kouassi, J. Prohens, Interspecific hybridization between eggplant and wild  
552 relatives from different genepools, *J. Am. Soc. Hortic. Sci.* 141 (2016) 34–44.  
553 <https://doi.org/10.21273/jashs.141.1.34>.
- 554 [29] R.H.G. Ranil, H.M.L. Niran, M. Plazas, R.M. Fonseka, H.H. Fonseka, S.  
555 Vilanova, I. Andújar, P. Gramazio, A. Fita, J. Prohens, Improving seed  
556 germination of the eggplant rootstock *Solanum torvum* by testing multiple factors  
557 using an orthogonal array design, *Sci. Hortic. (Amsterdam)*. 193 (2015) 174–181.  
558 <https://doi.org/10.1016/j.scienta.2015.07.030>.



- 559 [30] B. Renau-Morata, M. Sánchez-Perales, J. Medina, R. Molina, R. Corrales, L.  
560 Carrillo, P. Fernández-Nohales, J. Marqués, S. Pollmann, J. Vicente-Carbajosa,  
561 A. Granell, S. Nebauer, Salinity assay in tomato, *Bio-Protocol*. 4 (2016) e1215.  
562 <https://doi.org/10.21769/bioprotoc.1215>.
- 563 [31] D.R. Hoagland, D.I. Arnon, The water-culture method for growing plants without  
564 soil, *Circ. Calif. Agric. Exp. Stn.* 347 (1950) 1–32.
- 565 [32] S. Anders, W. Huber, Differential expression analysis for sequence count data,  
566 *Nat. Preced.* 11 (2010) 1–1. <https://doi.org/10.1186/gb-2010-11-10-r106>.
- 567 [33] Y. Benjamini, Y. Hochberg, Controlling the false discovery rate: a practical and  
568 powerful approach to multiple testing, *J. R. Stat. Soc. Ser. B.* 57 (1995) 289–300.  
569 <https://doi.org/10.1111/j.2517-6161.1995.tb02031.x>.
- 570 [34] L. Barchi, M. Pietrella, L. Venturini, A. Minio, L. Toppino, A. Acquadro, G.  
571 Andolfo, G. Aprea, C. Avanzato, L. Bassolino, C. Comino, A.D. Molin, A.  
572 Ferrarini, L.C. Maor, E. Portis, S. Reyes-Chin-Wo, R. Rinaldi, T. Sala, D.  
573 Scaglione, P. Sonawane, P. Tononi, E. Almekias-Siegl, E. Zago, M.R. Ercolano,  
574 A. Aharoni, M. Delledonne, G. Giuliano, S. Lanteri, G.L. Rotino, A  
575 chromosome-anchored eggplant genome sequence reveals key events in  
576 Solanaceae evolution, *Sci. Rep.* 9 (2019) 11769. <https://doi.org/10.1038/s41598-019-47985-w>.
- 578 [35] P. Bardou, J. Mariette, F. Escudié, C. Djemiel, C. Klopp, jvenn: an interactive  
579 Venn diagram viewer, *BMC Bioinformatics.* 15 (2014) 1–7.  
580 <https://doi.org/10.1186/1471-2105-15-293>.
- 581 [36] T. Metsalu, J. Vilo, ClustVis: a web tool for visualizing clustering of multivariate  
582 data using Principal Component Analysis and heatmap, *Nucleic Acids Res.* 43  
583 (2015) 566–570. <https://doi.org/10.1093/nar/gkv468>.
- 584 [37] M.H. Behboudian, Responses of eggplant to drought. I. Plant water balance, *Sci.*  
585 *Hortic. (Amsterdam).* 7 (1977) 303–310. [https://doi.org/10.1016/0304-4238\(77\)90002-4](https://doi.org/10.1016/0304-4238(77)90002-4).
- 587 [38] E.F. Delfin, S.T. Drobitch, L.H. Comas, Plant strategies for maximizing growth  
588 during water stress and subsequent recovery in *Solanum melongena* L.  
589 (eggplant), *PLoS One.* 16 (2021) 1–18.

- 590 <https://doi.org/10.1371/journal.pone.0256342>.
- 591 [39] Q.S. Fu, R.C. Yang, H.S. Wang, B. Zhao, C.L. Zhou, S.X. Ren, Y.D. Guo, Leaf  
592 morphological and ultrastructural performance of eggplant (*Solanum melongena*  
593 L.) in response to water stress, *Photosynthetica*. 51 (2013) 109–114.  
594 <https://doi.org/10.1007/s11099-013-0005-6>.
- 595 [40] M. Plazas, H.T. Nguyen, S. González-Orenga, A. Fita, O. Vicente, J. Prohens, M.  
596 Boscaiu, Comparative analysis of the responses to water stress in eggplant  
597 (*Solanum melongena*) cultivars, *Plant Physiol. Biochem.* 143 (2019) 72–82.  
598 <https://doi.org/10.1016/j.plaphy.2019.08.031>.
- 599 [41] B.E. Michel, M.R. Kaufmann, The osmotic potential of polyethylene glycol  
600 6000, *Plant Physiol.* 51 (1973) 914–916. <https://doi.org/10.1104/pp.51.5.914>.
- 601 [42] R. Stark, M. Grzelak, J. Hadfield, RNA sequencing: the teenage years, *Nat. Rev.*  
602 *Genet.* 20 (2019) 631–656. <https://doi.org/10.1038/s41576-019-0150-2>.
- 603 [43] X. Yang, J. Liu, J. Xu, S. Duan, Q. Wang, G. Li, L. Jin, Transcriptome profiling  
604 reveals effects of drought stress on gene expression in diploid potato genotype  
605 P3-198, *Int. J. Mol. Sci.* 20 (2019) 1–18. <https://doi.org/10.3390/ijms20040852>.
- 606 [44] K.B. Moon, D.J. Ahn, J.S. Park, W.Y. Jung, H.S. Cho, H.R. Kim, J.H. Jeon, Y. Il  
607 Park, H.S. Kim, Transcriptome profiling and characterization of drought-tolerant  
608 potato plant (*Solanum tuberosum* L.), *Mol. Cells.* 41 (2018) 979–992.  
609 <https://doi.org/10.14348/molcells.2018.0312>.
- 610 [45] B. Stratilová, S. Kozmon, E. Stratilová, M. Hrmova, Plant xyloglucan  
611 xyloglucosyl transferases and the cell wall structure: Subtle but significant,  
612 *Molecules.* 25 (2020) 1–25. <https://doi.org/10.3390/molecules25235619>.
- 613 [46] R. Tenhaken, Cell wall remodeling under abiotic stress, *Front. Plant Sci.* 5 (2015)  
614 1–9. <https://doi.org/10.3389/fpls.2014.00771>.
- 615 [47] D. Li, Y.J. He, S. Li, S. Shi, L. Li, Y. Liu, H. Chen, Genome-wide  
616 characterization and expression analysis of AP2/ERF genes in eggplant (*Solanum*  
617 *melongena* L.), *Plant Physiol. Biochem.* 167 (2021) 492–503.  
618 <https://doi.org/10.1016/j.plaphy.2021.08.006>.
- 619 [48] S. Sun, J.P. Yu, F. Chen, T.J. Zhao, X.H. Fang, Y.Q. Li, S.F. Sui, TINY, a

- 620 dehydration-responsive element (DRE)-binding protein-like transcription factor  
621 connecting the DRE- and ethylene-responsive element-mediated signaling  
622 pathways in Arabidopsis, *J. Biol. Chem.* 283 (2008) 6261–6271.  
623 <https://doi.org/10.1074/jbc.M706800200>.
- 624 [49] M.S. Islam, M.H. Wang, Expression of dehydration responsive element-binding  
625 protein-3 (DREB3) under different abiotic stresses in tomato, *BMB Rep.* 42  
626 (2009) 611–616. <https://doi.org/10.5483/BMBRep.2009.42.9.611>.
- 627 [50] Y. Gao, S. Gao, C. Xiong, G. Yu, J. Chang, Z. Ye, C. Yang, Comprehensive  
628 analysis and expression profile of the homeodomain leucine zipper IV  
629 transcription factor family in tomato, *Plant Physiol. Biochem.* 96 (2015) 141–  
630 153. <https://doi.org/10.1016/j.plaphy.2015.07.025>.
- 631 [51] P. Jiao, Z. Jiang, X. Wei, S. Liu, J. Qu, S. Guan, Y. Ma, Overexpression of the  
632 homeobox-leucine zipper protein ATHB-6 improves the drought tolerance of  
633 maize (*Zea mays* L.), *Plant Sci.* 316 (2022) 111159.  
634 <https://doi.org/10.1016/j.plantsci.2021.111159>.
- 635 [52] M.F. Perotti, P.A. Ribone, R.L. Chan, Plant transcription factors from the  
636 homeodomain-leucine zipper family I. Role in development and stress responses,  
637 *IUBMB Life.* 69 (2017) 280–289. <https://doi.org/10.1002/iub.1619>.
- 638 [53] M. Zhu, X. Meng, J. Cai, G. Li, T. Dong, Z. Li, Basic leucine zipper transcription  
639 factor SlbZIP1 mediates salt and drought stress tolerance in tomato, *BMC Plant*  
640 *Biol.* 18 (2018) 1–14. <https://doi.org/10.1186/s12870-018-1299-0>.
- 641 [54] F. Chen, Y. Hu, A. Vannozzi, K. Wu, H. Cai, Y. Qin, A. Mullis, Z. Lin, L.  
642 Zhang, The WRKY Transcription Factor Family in Model Plants and Crops,  
643 *CRC. Crit. Rev. Plant Sci.* 36 (2017) 311–335.  
644 <https://doi.org/10.1080/07352689.2018.1441103>.
- 645 [55] S. Bouzroud, S. Gouiaa, N. Hu, A. Bernadac, I. Mila, N. Bendaou, A.A. Smouni,  
646 M. Bouzayen, M. Zouine, Auxin response factors (ARFs) are potential mediators  
647 of auxin action in tomato response to biotic and abiotic stress (*Solanum*  
648 *lycopersicum*), *PLoS One.* 13 (2018) 1–20.  
649 <https://doi.org/10.1371/journal.pone.0193517>.
- 650 [56] R. Wang, P. Zhao, N. Kong, R. Lu, Y. Pei, C. Huang, H. Ma, Q. Chen, Genome-

- 651 wide identification and characterization of the Potato bHLH Transcription factor  
652 family, *Genes (Basel)*. 9 (2018) 54. <https://doi.org/10.3390/genes9010054>.
- 653 [57] Z. Zhang, J. Chen, C. Liang, F. Liu, X. Hou, X. Zou, Genome-wide identification  
654 and characterization of the bHLH transcription factor family in pepper (*Capsicum*  
655 *annuum* L.), *Front. Genet.* 11 (2020) 1–14.  
656 <https://doi.org/10.3389/fgene.2020.570156>.
- 657 [58] A. Daszkowska-Golec, The role of Abscisic Acid in drought stress: How ABA  
658 helps plants to cope with drought stress, in: *Drought Stress Toler. Plants*, Vol 2,  
659 Springer International Publishing, 2016: pp. 123–186.
- 660 [59] A. de Zelicourt, J. Colcombet, H. Hirt, The role of MAPK modules and ABA  
661 during abiotic stress signaling, *Trends Plant Sci.* 21 (2016) 677–685.  
662 <https://doi.org/10.1016/j.tplants.2016.04.004>.
- 663 [60] L. Gong, H. Zhang, X. Gan, L. Zhang, Y. Chen, F. Nie, L. Shi, M. Li, Z. Guo, G.  
664 Zhang, Y. Song, Transcriptome profiling of the potato (*Solanum tuberosum* L.)  
665 plant under drought stress and water-stimulus conditions, *PLoS One.* 10 (2015)  
666 1–20. <https://doi.org/10.1371/journal.pone.0128041>.
- 667 [61] Z. He, J. Wu, X. Sun, M. Dai, The Maize Clade A PP2C Phosphatases play  
668 critical roles in multiple abiotic stress responses, *Int. J. Mol. Sci.* 20 (2019) 3573.  
669 <https://doi.org/10.3390/ijms20143573>.
- 670 [62] Q. Yang, K. Liu, X. Niu, Q. Wang, Y. Wan, F. Yang, G. Li, Y. Wang, R. Wang,  
671 Genome-wide Identification of PP2C Genes and Their Expression Profiling in  
672 Response to Drought and Cold Stresses in *Medicago truncatula*, *Sci. Rep.* 8  
673 (2018) 1–14. <https://doi.org/10.1038/s41598-018-29627-9>.
- 674 [63] J. Wu, J. Wang, C. Pan, X. Guan, Y. Wang, S. Liu, Y. He, J. Chen, L. Chen, G.  
675 Lu, Genome-wide identification of MAPKK and MAPKKK gene families in  
676 tomato and transcriptional profiling analysis during development and stress  
677 response, *PLoS One.* 9 (2014) 19–21.  
678 <https://doi.org/10.1371/journal.pone.0103032>.
- 679 [64] M.G. Selvaraj, T. Ishizaki, M. Valencia, S. Ogawa, B. Dedicova, T. Ogata, K.  
680 Yoshiwara, K. Maruyama, M. Kusano, K. Saito, F. Takahashi, K. Shinozaki, K.  
681 Nakashima, M. Ishitani, Overexpression of an *Arabidopsis thaliana* galactinol

- 682 synthase gene improves drought tolerance in transgenic rice and increased grain  
683 yield in the field, *Plant Biotechnol. J.* 15 (2017) 1465–1477.  
684 <https://doi.org/10.1111/pbi.12731>.
- 685 [65] D.T. Le, R. Nishiyama, Y. Watanabe, R. Vankova, M. Tanaka, M. Seki, L.H.  
686 Ham, K. Yamaguchi-Shinozaki, K. Shinozaki, L.S.P. Tran, Identification and  
687 expression analysis of Cytokinin metabolic genes in soybean under normal and  
688 drought conditions in relation to Cytokinin levels, *PLoS One.* 7 (2012).  
689 <https://doi.org/10.1371/journal.pone.0042411>.
- 690 [66] R. Nishiyama, Y. Watanabe, Y. Fujita, D.T. Le, M. Kojima, T. Werner, R.  
691 Vankova, K. Yamaguchi-Shinozaki, K. Shinozaki, T. Kakimoto, H. Sakakibara,  
692 T. Schmülling, L.S.P. Tran, Analysis of cytokinin mutants and regulation of  
693 cytokinin metabolic genes reveals important regulatory roles of cytokinins in  
694 drought, salt and abscisic acid responses, and abscisic acid biosynthesis, *Plant*  
695 *Cell.* 23 (2011) 2169–2183. <https://doi.org/10.1105/tpc.111.087395>.
- 696 [67] S.M. Li, H.X. Zheng, X.S. Zhang, N. Sui, Cytokinins as central regulators during  
697 plant growth and stress response, *Plant Cell Rep.* 40 (2021) 271–282.  
698 <https://doi.org/10.1007/s00299-020-02612-1>.
- 699 [68] D. Baek, W.Y. Kim, J.Y. Cha, H.J. Park, G. Shin, J. Park, C.J. Lim, H.J. Chun,  
700 N. Li, D.H. Kim, S.Y. Lee, J.M. Pardo, M.C. Kim, D.J. Yun, The GIGANTEA-  
701 ENHANCED em LEVEL complex enhances drought tolerance via regulation of  
702 abscisic acid synthesis, *Plant Physiol.* 184 (2020) 443–458.  
703 <https://doi.org/10.1104/PP.20.00779>.
- 704 [69] A. Sharma, B. Shahzad, A. Rehman, R. Bhardwaj, M. Landi, B. Zheng, Response  
705 of phenylpropanoid pathway and the role of polyphenols in plants under abiotic  
706 stress, *Molecules.* 24 (2019) 1–22. <https://doi.org/10.3390/molecules24132452>.
- 707 [70] A.R. Reddy, K.V. Chaitanya, M. Vivekanandan, Drought-induced responses of  
708 photosynthesis and antioxidant metabolism in higher plants, *J. Plant Physiol.* 161  
709 (2004) 1189–1202. <https://doi.org/10.1016/j.jplph.2004.01.013>.
- 710 [71] D.P. Dixon, M. Skipsey, R. Edwards, Roles for glutathione transferases in plant  
711 secondary metabolism, *Phytochemistry.* 71 (2010) 338–350.  
712 <https://doi.org/10.1016/j.phytochem.2009.12.012>.

- 713 [72] X. Zi, S. Zhou, B. Wu, Alpha-Linolenic Acid Mediates Diverse Drought  
714 Responses in Maize (*Zea mays* L.) at Seedling and Flowering Stages, *Molecules*.  
715 27 (2022) 771. <https://doi.org/10.3390/molecules27030771>.
- 716 [73] N. Stortenbeker, M. Bemer, The SAUR gene family: The plant's toolbox for  
717 adaptation of growth and development, *J. Exp. Bot.* 70 (2019) 17–27.  
718 <https://doi.org/10.1093/jxb/ery332>.
- 719
